# Supplementary material
Source: ML conference proceedings conference paper supplement (https://openaccess.thecvf.com/content/CVPR2025/html/Wang_Vision-Language_Model_IP_CVPR_2025_paper.html)
Supplement: Supplementary file 1 [file Wang_Vision-Language_Model_IP_CVPR_2025_supplemental.pdf]

# Vision-Language Model IP Protection via Prompt-based Learning

## Supplementary Material

| Augmentation | Augmentation                                       |
|--------------|----------------------------------------------------|
| AutoContrast | Applies automatic contrast adjustment to an image. |
| Brightness   | Adjusts the brightness of an image.                |
| Color        | Adjusts the color saturation of an image.          |
| Contrast     | Adjusts the contrast of an image.                  |
| Equalize     | Equalizes the histogram of an image.               |
| Identity     | Returns the image without any changes.             |
| Posterize    | Reduces the color depth of an image.               |
| Rotate       | Rotates an image by a random degree.               |
| Sharpness    | Adjusts the sharpness of an image.                 |
| ShearX       | Shears an image along the X-axis.                  |
| ShearY       | Shears an image along the Y-axis.                  |
| Solarize     | Inverts all pixel values above a threshold         |
| TranslateX   | Translates an image horizontally.                  |
| TranslateY   | Translates an image vertically                     |

Table 1. A detailed description of the augmentation method applied in the target-free scenario.

---

### Algorithm 1 Target-Specified IP-CLIP.

---

**Require:** The authorized domain  $D_a$ , unauthorized domain  $D_u$ , visual encoder of CLIP with  $L$  layers, text encoder of CLIP, the parameters  $\theta$  of IP Projector  $P$  and  $\phi$  of STAM.

- 1: Construct authorized domain  $B_a$  with  $D_a$ , and unauthorized domain  $B_u$  with  $D_u$ .
- 2: **For**  $epoch = 1$  **to**  $Max_{epochs}$  **do**
- 3:     Calculate the output of  $x_a, x_u$  in visual encoder:  $f_v^a, f_v^u$ .
- 4:     Calculate the augmented feature:  $s_v^a, s_v^u$
- 5:     Construct  $Prompt_a$  and  $Prompt_u$  by multi-scale features from the L-layer visual encoder.
- 6:     Calculate the output of  $Prompt_a, Prompt_u$  in text encoder:  $f_t^a, f_t^u$ .
- 7:     Update  $\theta$  by Eq. (12)
- 8: **End For**
- 9: Return projector parameters  $\theta$  and  $\phi$ .

---

**Algorithm 2** Target-Free IP-CLIP.

**Require:** The authorized domain  $D_a$ , visual encoder of CLIP with  $L$  layers, text encoder of CLIP, the parameters  $\theta$  of IP Projector, the parameters  $\phi$  of STAM, augmentation pool  $A = \{a_i\}_{i=1}^{N_A}$ , and number of augmentation  $n_{aug} < N_A$ .

- 1: Initialize unauthorized domain  $D_u = \emptyset$ .
- 2: **For**  $i = 1$  **to**  $N_a$  **do**
- 3:     **For**  $j = 1$  **to**  $n_{aug}$  **do**
- 4:         Random select  $a_j \in A$
- 5:         style augmentation:  $x_i \leftarrow a_j(x_i)$
- 6:     **End For**
- 7:     Update  $D_u = D_u \cup x_i$
- 8: **End For**
- 9: Construct authorized domain  $B_a$  with  $D_a$ , and unauthorized domain  $B_u$  with  $D_u$ .
- 10: **For**  $epoch = 1$  **to**  $Max_{epochs}$  **do**
- 11:     Calculate the output of  $x_a, x_u$  in visual encoder:  $f_v^a, f_v^u$ .
- 12:     Calculate the augmented feature:  $s_v^a, s_v^u$
- 13:     Construct  $Prompt_a$  and  $Prompt_u$  by multi-scale features from the L-layer visual encoder.
- 14:     Calculate the output of  $Prompt_a, Prompt_u$  in test encoder:  $f_t^a, f_t^u$ .
- 15:     Update  $\theta$  by Eq. (12).
- 16: **End For**
- 17: Return projector parameters  $\theta$  and  $\phi$ .

| Authorized/Unauthorized | Amazon                  | Dslr                    | Webcam                  | $W_{ua} \uparrow$ | $D_u \uparrow$ | $D_a \downarrow$ |
|-------------------------|-------------------------|-------------------------|-------------------------|-------------------|----------------|------------------|
| Amazon                  | 82.1 $\Rightarrow$ 79.0 | 79.7 $\Rightarrow$ 35.9 | 71.9 $\Rightarrow$ 4.7  | 41.37             | 55.50          | 3.10             |
| Dslr                    | 65.6 $\Rightarrow$ 9.4  | 99.2 $\Rightarrow$ 97.7 | 92.2 $\Rightarrow$ 0.0  | 70.94             | 74.20          | 1.55             |
| Webcam                  | 65.6 $\Rightarrow$ 3.1  | 93.8 $\Rightarrow$ 4.7  | 97.7 $\Rightarrow$ 97.7 | 74.02             | 75.80          | 0.00             |
| Mean                    | /                       |                         |                         | 62.11             | 68.50          | 2.07             |

Table 2. The accuracy (%) of target-specified NTL [28] on the Office-31 [26]. The vertical/horizontal axis denotes the authorized/unauthorized domain. In each task, the left of ' $\Rightarrow$ ' shows the test accuracy of supervised learning CNN on the unauthorized domain, while the right side presents the accuracy of NTL.  $W_{ua}$  represents the proposed weighted drop, while  $D_u$  and  $D_a$  denote the drop rates for the unauthorized and authorized domains, respectively.

| Authorized/Unauthorized | Amazon                  | Dslr                    | Webcam                  | $W_{ua} \uparrow$ | $D_u \uparrow$ | $D_a \downarrow$ |
|-------------------------|-------------------------|-------------------------|-------------------------|-------------------|----------------|------------------|
| Amazon                  | 82.1 $\Rightarrow$ 81.3 | 79.7 $\Rightarrow$ 0.0  | 71.9 $\Rightarrow$ 0.0  | 60.94             | 75.80          | 0.80             |
| Dslr                    | 65.6 $\Rightarrow$ 3.1  | 99.2 $\Rightarrow$ 98.4 | 92.2 $\Rightarrow$ 0.0  | 75.33             | 77.35          | 0.80             |
| Webcam                  | 65.6 $\Rightarrow$ 3.1  | 93.8 $\Rightarrow$ 4.7  | 97.7 $\Rightarrow$ 97.7 | 74.02             | 75.80          | 0.00             |
| Mean                    | /                       |                         |                         | 70.09             | 76.32          | 0.53             |

Table 3. The accuracy (%) of target-specified CUTI-Domain [29] on the Office-31 [26]. The vertical/horizontal axis denotes the authorized/unauthorized domain. In each task, the left of ' $\Rightarrow$ ' shows the test accuracy of supervised learning CNN on the unauthorized domain, while the right side presents the accuracy of CUTI-Domain.  $W_{ua}$  represents the proposed weighted drop, while  $D_u$  and  $D_a$  denote the drop rates for the unauthorized and authorized domains, respectively.

| Authorized/Unauthorized | Amazon                  | Dslr                    | Webcam                  | $W_{ua} \uparrow$ | $D_u \uparrow$ | $D_a \downarrow$ |
|-------------------------|-------------------------|-------------------------|-------------------------|-------------------|----------------|------------------|
| Amazon                  | 79.4 $\Rightarrow$ 77.6 | 87.5 $\Rightarrow$ 10.0 | 88.8 $\Rightarrow$ 17.5 | 56.34             | 74.40          | 1.80             |
| Dslr                    | 83.8 $\Rightarrow$ 10.0 | 95.7 $\Rightarrow$ 94.4 | 98.8 $\Rightarrow$ 8.8  | 76.09             | 81.90          | 1.30             |
| Webcam                  | 80.0 $\Rightarrow$ 3.8  | 92.5 $\Rightarrow$ 91.3 | 94.4 $\Rightarrow$ 91.3 | 32.50             | 38.70          | 3.10             |
| Mean                    | /                       |                         |                         | 54.98             | 65.00          | 2.07             |

Table 4. The accuracy (%) of target-specified CLIP-based NTL [28] on the Office-31 [26]. The vertical/horizontal axis denotes the authorized/unauthorized domain. In each task, the left of ' $\Rightarrow$ ' shows the test accuracy of supervised learning CLIP on the unauthorized domain, while the right side presents the accuracy of CLIP-based NTL.  $W_{ua}$  represents the proposed weighted drop, while  $D_u$  and  $D_a$  denote the drop rates for the unauthorized and authorized domains, respectively.

| Authorized/Unauthorized | Amazon                  | Dslr                    | Webcam                  | $W_{ua} \uparrow$ | $D_u \uparrow$ | $D_a \downarrow$ |
|-------------------------|-------------------------|-------------------------|-------------------------|-------------------|----------------|------------------|
| Amazon                  | 79.4 $\Rightarrow$ 78.8 | 87.5 $\Rightarrow$ 6.3  | 88.8 $\Rightarrow$ 11.3 | 62.06             | 79.35          | 0.60             |
| Dslr                    | 83.8 $\Rightarrow$ 5.0  | 95.7 $\Rightarrow$ 95.0 | 98.8 $\Rightarrow$ 7.5  | 80.13             | 85.05          | 0.70             |
| Webcam                  | 80.0 $\Rightarrow$ 1.3  | 92.5 $\Rightarrow$ 2.5  | 94.4 $\Rightarrow$ 91.9 | 75.24             | 84.38          | 2.50             |
| Mean                    | /                       |                         |                         | 72.48             | 82.93          | 1.27             |

Table 5. The accuracy (%) of target-specified CLIP-based CUTI-Domain [29] on the Office-31 [26]. The vertical/horizontal axis denotes the authorized/unauthorized domain. In each task, the left of ' $\Rightarrow$ ' shows the test accuracy of supervised learning CLIP on the unauthorized domain, while the right side presents the accuracy of CLIP-based CUTI-Domain.  $W_{ua}$  represents the proposed weighted drop, while  $D_u$  and  $D_a$  denote the drop rates for the unauthorized and authorized domains, respectively.

| Authorized/Unauthorized | Amazon                  | Dslr                    | Webcam                  | $W_{ua} \uparrow$ | $D_u \uparrow$ | $D_a \downarrow$ |
|-------------------------|-------------------------|-------------------------|-------------------------|-------------------|----------------|------------------|
| Amazon                  | 79.4 $\Rightarrow$ 79.4 | 87.5 $\Rightarrow$ 7.5  | 88.8 $\Rightarrow$ 8.8  | 63.52             | 80.00          | 0.00             |
| Dslr                    | 83.8 $\Rightarrow$ 3.8  | 95.7 $\Rightarrow$ 95.7 | 98.8 $\Rightarrow$ 6.3  | 82.54             | 86.25          | 0.00             |
| Webcam                  | 80.0 $\Rightarrow$ 3.8  | 92.5 $\Rightarrow$ 2.5  | 94.4 $\Rightarrow$ 94.4 | 78.45             | 83.10          | 0.00             |
| Mean                    | /                       |                         |                         | 74.84             | 83.12          | 0.00             |

Table 6. The accuracy (%) of target-specified IP-CLIP on the Office-31 [26]. The vertical/horizontal axis denotes the authorized/unauthorized domain. In each task, the left of ' $\Rightarrow$ ' shows the test accuracy of supervised learning CLIP on the unauthorized domain, while the right side presents the accuracy of IP-CLIP.  $W_{ua}$  represents the proposed weighted drop, while  $D_u$  and  $D_a$  denote the drop rates for the unauthorized and authorized domains, respectively.

| Authorized/Unauthorized | Art                     | Clipart                 | Product                 | RealWorld               | $W_{ua} \uparrow$ | $D_u \uparrow$ | $D_a \downarrow$ |
|-------------------------|-------------------------|-------------------------|-------------------------|-------------------------|-------------------|----------------|------------------|
| Art                     | 76.3 $\Rightarrow$ 75.5 | 47.1 $\Rightarrow$ 1.8  | 64.9 $\Rightarrow$ 2.6  | 72.2 $\Rightarrow$ 68.0 | 27.53             | 37.27          | 0.80             |
| Clipart                 | 57.8 $\Rightarrow$ 4.2  | 80.1 $\Rightarrow$ 79.9 | 63.5 $\Rightarrow$ 6.5  | 68.8 $\Rightarrow$ 16.4 | 43.23             | 54.31          | 0.20             |
| Product                 | 56.6 $\Rightarrow$ 6.3  | 45.2 $\Rightarrow$ 3.4  | 92.7 $\Rightarrow$ 92.4 | 72.7 $\Rightarrow$ 29.7 | 41.31             | 45.01          | 0.30             |
| RealWorld               | 63.8 $\Rightarrow$ 26.6 | 49.2 $\Rightarrow$ 6.5  | 75.5 $\Rightarrow$ 64.3 | 84.4 $\Rightarrow$ 82.0 | 22.93             | 30.37          | 2.40             |
| Mean                    | /                       |                         |                         |                         | 33.75             | 41.74          | 0.43             |

Table 7. The accuracy (%) of target-specified NTL [28] on the Office-Home-65 [27]. The vertical/horizontal axis denotes the authorized/unauthorized domain. In each task, the left of ' $\Rightarrow$ ' shows the test accuracy of supervised learning CNN on the unauthorized domain, while the right side presents the accuracy of NTL.  $W_{ua}$  represents the proposed weighted drop, while  $D_u$  and  $D_a$  denote the drop rates for the unauthorized and authorized domains, respectively.

| Authorized/Unauthorized | Art                     | Clipart                 | Product                 | RealWorld               | $W_{ua} \uparrow$ | $D_u \uparrow$ | $D_a \downarrow$ |
|-------------------------|-------------------------|-------------------------|-------------------------|-------------------------|-------------------|----------------|------------------|
| Art                     | 76.3 $\Rightarrow$ 76.0 | 47.1 $\Rightarrow$ 4.4  | 64.9 $\Rightarrow$ 9.4  | 72.2 $\Rightarrow$ 28.9 | 35.62             | 47.16          | 0.30             |
| Clipart                 | 57.8 $\Rightarrow$ 4.4  | 80.1 $\Rightarrow$ 79.9 | 63.5 $\Rightarrow$ 5.5  | 68.8 $\Rightarrow$ 8.1  | 45.67             | 57.35          | 0.20             |
| Product                 | 56.6 $\Rightarrow$ 9.1  | 45.2 $\Rightarrow$ 4.2  | 92.7 $\Rightarrow$ 92.2 | 72.7 $\Rightarrow$ 23.7 | 41.78             | 45.82          | 0.50             |
| RealWorld               | 63.8 $\Rightarrow$ 31.3 | 49.2 $\Rightarrow$ 8.6  | 75.5 $\Rightarrow$ 19.8 | 84.4 $\Rightarrow$ 84.1 | 35.87             | 42.95          | 0.30             |
| Mean                    | /                       |                         |                         |                         | 39.73             | 48.32          | 0.33             |

Table 8. The accuracy (%) of target-specified CUTI-Domain [29] on the Office-Home-65 [27]. The vertical/horizontal axis denotes the authorized/unauthorized domain. In each task, the left of ' $\Rightarrow$ ' shows the test accuracy of supervised learning CNN on the unauthorized domain, while the right side presents the accuracy of CUTI-Domain.  $W_{ua}$  represents the proposed weighted drop, while  $D_u$  and  $D_a$  denote the drop rates for the unauthorized and authorized domains, respectively.

| Authorized/Unauthorized | Art                     | Clipart                 | Product                 | RealWorld               | $W_{ua} \uparrow$ | $D_u \uparrow$ | $D_a \downarrow$ |
|-------------------------|-------------------------|-------------------------|-------------------------|-------------------------|-------------------|----------------|------------------|
| Art                     | 85.5 $\Rightarrow$ 85.4 | 68.0 $\Rightarrow$ 23.8 | 89.8 $\Rightarrow$ 86.5 | 88.5 $\Rightarrow$ 88.5 | 13.44             | 15.83          | 0.10             |
| Clipart                 | 81.0 $\Rightarrow$ 18.3 | 75.0 $\Rightarrow$ 74.7 | 90.8 $\Rightarrow$ 15.0 | 89.5 $\Rightarrow$ 31.0 | 48.83             | 65.67          | 0.30             |
| Product                 | 78.8 $\Rightarrow$ 11.0 | 73.3 $\Rightarrow$ 13.8 | 92.8 $\Rightarrow$ 92.8 | 87.5 $\Rightarrow$ 85.8 | 39.90             | 43.00          | 0.00             |
| RealWorld               | 83.0 $\Rightarrow$ 80.8 | 71.3 $\Rightarrow$ 7.8  | 90.8 $\Rightarrow$ 52.5 | 90.0 $\Rightarrow$ 88.1 | 28.87             | 34.67          | 1.90             |
| Mean                    | /                       |                         |                         |                         | 32.76             | 39.79          | 0.57             |

Table 9. The accuracy (%) of target-specified CLIP-based NTL [28] on the Office-Home-65 [27]. The vertical/horizontal axis denotes the authorized/unauthorized domain. In each task, the left of ' $\Rightarrow$ ' shows the test accuracy of supervised learning CLIP on the unauthorized domain, while the right side presents the accuracy of CLIP-based NTL.  $W_{ua}$  represents the proposed weighted drop, while  $D_u$  and  $D_a$  denote the drop rates for the unauthorized and authorized domains, respectively.

| Authorized/Unauthorized | Art                     | Clipart                 | Product                 | RealWorld               | $W_{ua} \uparrow$ | $D_u \uparrow$ | $D_a \downarrow$ |
|-------------------------|-------------------------|-------------------------|-------------------------|-------------------------|-------------------|----------------|------------------|
| Art                     | 85.5 $\Rightarrow$ 82.5 | 68.0 $\Rightarrow$ 16.8 | 89.8 $\Rightarrow$ 21.3 | 88.5 $\Rightarrow$ 48.0 | 41.58             | 53.40          | 3.00             |
| Clipart                 | 81.0 $\Rightarrow$ 15.8 | 75.0 $\Rightarrow$ 75.0 | 90.8 $\Rightarrow$ 9.0  | 89.5 $\Rightarrow$ 19.3 | 53.37             | 72.40          | 0.63             |
| Product                 | 78.8 $\Rightarrow$ 16.3 | 73.3 $\Rightarrow$ 10.8 | 92.8 $\Rightarrow$ 92.4 | 87.5 $\Rightarrow$ 27.0 | 56.82             | 61.83          | 0.37             |
| RealWorld               | 83.0 $\Rightarrow$ 30.3 | 71.3 $\Rightarrow$ 10.0 | 90.8 $\Rightarrow$ 32.8 | 90.0 $\Rightarrow$ 88.5 | 49.41             | 57.33          | 1.50             |
| Mean                    | /                       |                         |                         |                         | 50.29             | 61.24          | 1.38             |

Table 10. The accuracy (%) of target-specified CLIP-based CUTI-Domain [29] on the Office-Home-65 [27]. The vertical/horizontal axis denotes the authorized/unauthorized domain. In each task, the left of ' $\Rightarrow$ ' shows the test accuracy of supervised learning CLIP on the unauthorized domain, while the right side presents the accuracy of CLIP-based CUTI-Domain.  $W_{ua}$  represents the proposed weighted drop, while  $D_u$  and  $D_a$  denote the drop rates for the unauthorized and authorized domains, respectively.

| Authorized/Unauthorized | Art                     | Clipart                 | Product                 | RealWorld               | $W_{ua} \uparrow$ | $D_u \uparrow$ | $D_a \downarrow$ |
|-------------------------|-------------------------|-------------------------|-------------------------|-------------------------|-------------------|----------------|------------------|
| Art                     | 85.5 $\Rightarrow$ 85.2 | 68.0 $\Rightarrow$ 12.8 | 89.8 $\Rightarrow$ 15.0 | 88.5 $\Rightarrow$ 34.5 | 52.00             | 61.33          | 0.30             |
| Clipart                 | 81.0 $\Rightarrow$ 11.8 | 75.0 $\Rightarrow$ 74.9 | 90.8 $\Rightarrow$ 5.3  | 89.5 $\Rightarrow$ 17.8 | 56.45             | 75.47          | 0.10             |
| Product                 | 78.8 $\Rightarrow$ 14.0 | 73.3 $\Rightarrow$ 8.5  | 92.8 $\Rightarrow$ 92.5 | 87.5 $\Rightarrow$ 25.8 | 58.71             | 63.77          | 0.30             |
| RealWorld               | 83.0 $\Rightarrow$ 30.3 | 71.3 $\Rightarrow$ 7.5  | 90.8 $\Rightarrow$ 29.3 | 90.0 $\Rightarrow$ 89.9 | 53.25             | 59.33          | 0.10             |
| Mean                    | /                       |                         |                         |                         | 55.10             | 64.98          | 0.20             |

Table 11. The accuracy (%) of target-specified IP-CLIP on the Office-Home-65 [27]. The vertical/horizontal axis denotes the authorized/unauthorized domain. In each task, the left of ' $\Rightarrow$ ' shows the test accuracy of supervised learning CLIP on the unauthorized domain, while the right side presents the accuracy of IP-CLIP.  $W_{ua}$  represents the proposed weighted drop, while  $D_u$  and  $D_a$  denote the drop rates for the unauthorized and authorized domains, respectively.

| Authorized/Unauthorized | Art                     | Clipart                 | Product                 | Real                    | $W_{ua} \uparrow$ | $D_u \uparrow$ | $D_a \downarrow$ |
|-------------------------|-------------------------|-------------------------|-------------------------|-------------------------|-------------------|----------------|------------------|
| Clipart                 | 76.4 $\Rightarrow$ 74.3 | 49.5 $\Rightarrow$ 12.7 | 62.5 $\Rightarrow$ 27.0 | 47.0 $\Rightarrow$ 9.5  | 25.63             | 36.60          | 2.10             |
| Painting                | 48.0 $\Rightarrow$ 5.8  | 61.8 $\Rightarrow$ 61.3 | 60.4 $\Rightarrow$ 38.3 | 42.3 $\Rightarrow$ 9.5  | 19.53             | 32.37          | 0.50             |
| Real                    | 52.3 $\Rightarrow$ 16.6 | 57.9 $\Rightarrow$ 27.8 | 85.6 $\Rightarrow$ 84.4 | 46.9 $\Rightarrow$ 5.1  | 29.26             | 35.87          | 1.20             |
| Sketch                  | 52.5 $\Rightarrow$ 13.7 | 46.9 $\Rightarrow$ 5.9  | 62.8 $\Rightarrow$ 5.3  | 66.6 $\Rightarrow$ 65.6 | 29.37             | 45.77          | 1.00             |
| Mean                    | /                       |                         |                         |                         | 25.95             | 37.65          | 1.27             |

Table 12. The accuracy (%) of target-specified NTL [28] on the Mini-DomainNet [34]. The vertical/horizontal axis denotes the authorized/unauthorized domain. In each task, the left of ' $\Rightarrow$ ' shows the test accuracy of supervised learning CNN on the unauthorized domain, while the right side presents the accuracy of NTL.  $W_{ua}$  represents the proposed weighted drop, while  $D_u$  and  $D_a$  denote the drop rates for the unauthorized and authorized domains, respectively.

| Authorized/Unauthorized | Art                     | Clipart                 | Product                 | Real                    | $W_{ua} \uparrow$ | $D_u \uparrow$ | $D_a \downarrow$ |
|-------------------------|-------------------------|-------------------------|-------------------------|-------------------------|-------------------|----------------|------------------|
| Clipart                 | 76.4 $\Rightarrow$ 75.6 | 49.5 $\Rightarrow$ 8.4  | 62.5 $\Rightarrow$ 19.9 | 47.0 $\Rightarrow$ 8.1  | 30.29             | 40.87          | 0.80             |
| Painting                | 48.0 $\Rightarrow$ 7.9  | 61.8 $\Rightarrow$ 61.1 | 60.4 $\Rightarrow$ 36.8 | 42.3 $\Rightarrow$ 6.3  | 19.88             | 33.23          | 0.70             |
| Real                    | 52.3 $\Rightarrow$ 14.0 | 57.9 $\Rightarrow$ 22.0 | 85.6 $\Rightarrow$ 84.5 | 46.9 $\Rightarrow$ 5.9  | 31.52             | 38.40          | 1.10             |
| Sketch                  | 52.5 $\Rightarrow$ 11.2 | 46.9 $\Rightarrow$ 5.4  | 62.8 $\Rightarrow$ 4.9  | 66.7 $\Rightarrow$ 65.7 | 30.18             | 46.90          | 0.96             |
| Mean                    | /                       |                         |                         |                         | 27.97             | 39.85          | 0.87             |

Table 13. The accuracy (%) of target-specified CUTI-Domain [29] on the Mini-DomainNet [34]. The vertical/horizontal axis denotes the authorized/unauthorized domain. In each task, the left of ' $\Rightarrow$ ' shows the test accuracy of supervised learning CNN on the unauthorized domain, while the right side presents the accuracy of CUTI-Domain.  $W_{ua}$  represents the proposed weighted drop, while  $D_u$  and  $D_a$  denote the drop rates for the unauthorized and authorized domains, respectively.

| Authorized/Unauthorized | Art                     | Clipart                 | Product                 | Real                    | $W_{ua} \uparrow$ | $D_u \uparrow$ | $D_a \downarrow$ |
|-------------------------|-------------------------|-------------------------|-------------------------|-------------------------|-------------------|----------------|------------------|
| Clipart                 | 85.1 $\Rightarrow$ 84.5 | 79.8 $\Rightarrow$ 33.3 | 89.8 $\Rightarrow$ 34.0 | 78.7 $\Rightarrow$ 42.1 | 38.62             | 46.30          | 0.60             |
| Painting                | 83.8 $\Rightarrow$ 11.9 | 81.4 $\Rightarrow$ 79.8 | 89.1 $\Rightarrow$ 60.5 | 78.4 $\Rightarrow$ 17.5 | 41.66             | 53.80          | 1.60             |
| Real                    | 84.6 $\Rightarrow$ 26.4 | 80.5 $\Rightarrow$ 30.8 | 90.6 $\Rightarrow$ 89.8 | 80.0 $\Rightarrow$ 10.8 | 52.29             | 59.03          | 0.80             |
| Sketch                  | 84.3 $\Rightarrow$ 83.0 | 79.1 $\Rightarrow$ 32.7 | 90.3 $\Rightarrow$ 9.7  | 80.7 $\Rightarrow$ 80.1 | 33.78             | 42.77          | 0.60             |
| Mean                    | /                       |                         |                         |                         | 41.59             | 50.48          | 1.00             |

Table 14. The accuracy (%) of target-specified CLIP-based NTL [28] on the Mini-DomainNet [34]. The vertical/horizontal axis denotes the authorized/unauthorized domain. In each task, the left of ' $\Rightarrow$ ' shows the test accuracy of supervised learning CLIP on the unauthorized domain, while the right side presents the accuracy of CLIP-based NTL.  $W_{ua}$  represents the proposed weighted drop, while  $D_u$  and  $D_a$  denote the drop rates for the unauthorized and authorized domains, respectively.

| Authorized/Unauthorized | Art                     | Clipart                 | Product                 | Real                    | $W_{ua} \uparrow$ | $D_u \uparrow$ | $D_a \downarrow$ |
|-------------------------|-------------------------|-------------------------|-------------------------|-------------------------|-------------------|----------------|------------------|
| Clipart                 | 85.1 $\Rightarrow$ 84.9 | 79.8 $\Rightarrow$ 22.7 | 89.8 $\Rightarrow$ 23.7 | 78.7 $\Rightarrow$ 23.7 | 50.26             | 59.40          | 0.20             |
| Painting                | 83.8 $\Rightarrow$ 17.9 | 81.4 $\Rightarrow$ 76.1 | 89.1 $\Rightarrow$ 15.6 | 78.4 $\Rightarrow$ 17.1 | 46.88             | 66.90          | 5.30             |
| Real                    | 84.6 $\Rightarrow$ 24.9 | 80.5 $\Rightarrow$ 23.8 | 90.6 $\Rightarrow$ 89.5 | 80.0 $\Rightarrow$ 9.5  | 54.77             | 62.30          | 1.10             |
| Sketch                  | 84.3 $\Rightarrow$ 24.0 | 79.1 $\Rightarrow$ 25.2 | 90.3 $\Rightarrow$ 10.8 | 80.7 $\Rightarrow$ 80.0 | 51.09             | 64.57          | 0.70             |
| Mean                    | /                       |                         |                         |                         | 50.75             | 63.29          | 2.20             |

Table 15. The accuracy (%) of target-specified CLIP-based CUTI-Domain [29] on the Mini-DomainNet [34]. The vertical/horizontal axis denotes the authorized/unauthorized domain. In each task, the left of ' $\Rightarrow$ ' shows the test accuracy of supervised learning CLIP on the unauthorized domain, while the right side presents the accuracy of CLIP-based CUTI-Domain.  $W_{ua}$  represents the proposed weighted drop, while  $D_u$  and  $D_a$  denote the drop rates for the unauthorized and authorized domains, respectively.

| Authorized/Unauthorized | Art                     | Clipart                 | Product                 | Real                    | $W_{ua} \uparrow$ | $D_u \uparrow$ | $D_a \downarrow$ |
|-------------------------|-------------------------|-------------------------|-------------------------|-------------------------|-------------------|----------------|------------------|
| Clipart                 | 85.1 $\Rightarrow$ 84.8 | 79.8 $\Rightarrow$ 18.1 | 89.8 $\Rightarrow$ 24.8 | 78.7 $\Rightarrow$ 22.4 | 51.47             | 61.00          | 0.30             |
| Painting                | 83.8 $\Rightarrow$ 9.2  | 81.4 $\Rightarrow$ 80.9 | 89.1 $\Rightarrow$ 26.5 | 78.4 $\Rightarrow$ 14.4 | 53.85             | 67.07          | 0.50             |
| Real                    | 84.6 $\Rightarrow$ 21.9 | 80.5 $\Rightarrow$ 21.4 | 90.6 $\Rightarrow$ 90.4 | 80.0 $\Rightarrow$ 6.0  | 58.82             | 65.27          | 0.20             |
| Sketch                  | 84.3 $\Rightarrow$ 23.2 | 79.1 $\Rightarrow$ 15.6 | 90.3 $\Rightarrow$ 9.2  | 80.7 $\Rightarrow$ 80.2 | 54.59             | 68.57          | 0.50             |
| Mean                    | /                       |                         |                         |                         | 54.68             | 65.48          | 0.33             |

Table 16. The accuracy (%) of target-specified IP-CLIP on the Mini-DomainNet [34]. The vertical/horizontal axis denotes the authorized/unauthorized domain. In each task, the left of ' $\Rightarrow$ ' shows the test accuracy of supervised learning CLIP on the unauthorized domain, while the right side presents the accuracy of IP-CLIP.  $W_{ua}$  represents the proposed weighted drop, while  $D_u$  and  $D_a$  denote the drop rates for the unauthorized and authorized domains, respectively.

| Authorized/Test | Amazon                  | Dslr                    | Webcam                  | $W_{ua} \uparrow$ | $D_u \uparrow$ | $D_a \downarrow$ |
|-----------------|-------------------------|-------------------------|-------------------------|-------------------|----------------|------------------|
| Amazon          | 82.1 $\Rightarrow$ 75.0 | 79.7 $\Rightarrow$ 64.1 | 71.9 $\Rightarrow$ 71.9 | 0.56              | 7.80           | 7.05             |
| Dslr            | 65.6 $\Rightarrow$ 48.4 | 99.2 $\Rightarrow$ 96.9 | 92.2 $\Rightarrow$ 90.6 | 6.88              | 9.40           | 2.30             |
| Webcam          | 65.6 $\Rightarrow$ 57.8 | 93.8 $\Rightarrow$ 84.4 | 97.7 $\Rightarrow$ 92.2 | 2.90              | 8.60           | 5.45             |
| Mean            | /                       |                         |                         | 3.45              | 8.60           | 4.93             |

Table 17. The accuracy (%) of target-free NTL [28] on the Office-31 [26]. The vertical/horizontal axis denotes the authorized/test domain. In each task, the left of ' $\Rightarrow$ ' shows the test accuracy of supervised learning CNN on the test domain, while the right side presents the accuracy of NTL.  $W_{ua}$  represents the proposed weighted drop, while  $D_u$  and  $D_a$  denote the drop rates for the unauthorized and authorized domains, respectively.

| Authorized/Test | Amazon                  | Dslr                    | Webcam                  | $W_{ua} \uparrow$ | $D_u \uparrow$ | $D_a \downarrow$ |
|-----------------|-------------------------|-------------------------|-------------------------|-------------------|----------------|------------------|
| Amazon          | 82.1 $\Rightarrow$ 75.0 | 79.7 $\Rightarrow$ 64.1 | 71.9 $\Rightarrow$ 60.9 | 4.69              | 13.30          | 7.05             |
| Dslr            | 65.6 $\Rightarrow$ 46.9 | 99.2 $\Rightarrow$ 96.9 | 92.2 $\Rightarrow$ 92.2 | 6.83              | 9.35           | 2.30             |
| Webcam          | 65.6 $\Rightarrow$ 59.4 | 93.8 $\Rightarrow$ 89.1 | 97.7 $\Rightarrow$ 95.3 | 2.95              | 5.45           | 2.35             |
| Mean            | /                       |                         |                         | 4.82              | 9.37           | 3.90             |

Table 18. The accuracy (%) of target-free CUTI-Domain [29] on the Office-31 [26]. The vertical/horizontal axis denotes the authorized/test domain. In each task, the left of ' $\Rightarrow$ ' shows the test accuracy of supervised learning CNN on the test domain, while the right side presents the accuracy of CUTI-Domain.  $W_{ua}$  represents the proposed weighted drop, while  $D_u$  and  $D_a$  denote the drop rates for the unauthorized and authorized domains, respectively.

| Authorized/Test | Amazon                  | Dslr                    | Webcam                  | $W_{ua} \uparrow$ | $D_u \uparrow$ | $D_a \downarrow$ |
|-----------------|-------------------------|-------------------------|-------------------------|-------------------|----------------|------------------|
| Amazon          | 79.4 $\Rightarrow$ 77.5 | 87.5 $\Rightarrow$ 62.5 | 88.8 $\Rightarrow$ 79.3 | 11.90             | 17.25          | 1.90             |
| Dslr            | 83.8 $\Rightarrow$ 27.0 | 95.7 $\Rightarrow$ 91.8 | 98.8 $\Rightarrow$ 67.8 | 36.72             | 43.90          | 3.90             |
| Webcam          | 80.0 $\Rightarrow$ 23.8 | 92.5 $\Rightarrow$ 46.8 | 94.4 $\Rightarrow$ 92.8 | 45.80             | 50.95          | 1.60             |
| Mean            | /                       |                         |                         | 31.47             | 37.37          | 2.47             |

Table 19. The accuracy (%) of target-free CLIP-based NTL [28] on the Office-31 [26]. The vertical/horizontal axis denotes the authorized/test domain. In each task, the left of ' $\Rightarrow$ ' shows the test accuracy of supervised learning CLIP on the test domain, while the right side presents the accuracy of CLIP-based NTL.  $W_{ua}$  represents the proposed weighted drop, while  $D_u$  and  $D_a$  denote the drop rates for the unauthorized and authorized domains, respectively.

| Authorized/Test | Amazon                  | Dslr                    | Webcam                  | $W_{ua} \uparrow$ | $D_u \uparrow$ | $D_a \downarrow$ |
|-----------------|-------------------------|-------------------------|-------------------------|-------------------|----------------|------------------|
| Amazon          | 79.4 $\Rightarrow$ 76.3 | 87.5 $\Rightarrow$ 34.5 | 88.8 $\Rightarrow$ 68.5 | 25.60             | 36.65          | 3.10             |
| Dslr            | 83.8 $\Rightarrow$ 15.0 | 95.7 $\Rightarrow$ 93.8 | 98.8 $\Rightarrow$ 81.0 | 38.83             | 43.30          | 1.90             |
| Webcam          | 80.0 $\Rightarrow$ 77.8 | 92.5 $\Rightarrow$ 27.5 | 94.4 $\Rightarrow$ 93.8 | 30.95             | 33.60          | 0.60             |
| Mean            | /                       |                         |                         | 31.80             | 37.85          | 1.87             |

Table 20. The accuracy (%) of target-free CLIP-based CUTI-Domain [29] on the Office-31 [26]. The vertical/horizontal axis denotes the authorized/test domain. In each task, the left of ' $\Rightarrow$ ' shows the test accuracy of supervised learning CLIP on the test domain, while the right side presents the accuracy of CLIP-based CUTI-Domain.  $W_{ua}$  represents the proposed weighted drop, while  $D_u$  and  $D_a$  denote the drop rates for the unauthorized and authorized domains, respectively.

| Authorized/Test | Amazon                  | Dslr                    | Webcam                  | $W_{ua} \uparrow$ | $D_u \uparrow$ | $D_a \downarrow$ |
|-----------------|-------------------------|-------------------------|-------------------------|-------------------|----------------|------------------|
| Amazon          | 79.4 $\Rightarrow$ 79.0 | 87.5 $\Rightarrow$ 9.8  | 88.8 $\Rightarrow$ 38.3 | 50.32             | 64.10          | 0.40             |
| Dslr            | 83.8 $\Rightarrow$ 23.3 | 95.7 $\Rightarrow$ 95.3 | 98.8 $\Rightarrow$ 64.3 | 44.89             | 47.50          | 0.40             |
| Webcam          | 80.0 $\Rightarrow$ 17.8 | 92.5 $\Rightarrow$ 10.0 | 94.4 $\Rightarrow$ 92.5 | 65.17             | 72.35          | 1.90             |
| Mean            | /                       |                         |                         | 53.46             | 61.32          | 0.90             |

Table 21. The accuracy (%) of target-specified IP-CLIP on the Office-31 [26]. The vertical/horizontal axis denotes the authorized/test domain. In each task, the left of ' $\Rightarrow$ ' shows the test accuracy of supervised learning CLIP on the test domain, while the right side presents the accuracy of IP-CLIP.  $W_{ua}$  represents the proposed weighted drop, while  $D_u$  and  $D_a$  denote the drop rates for the unauthorized and authorized domains, respectively.



| Authorized/Test | Art                     | Clipart                 | Product                 | RealWorld               | $W_{ua} \uparrow$ | $D_u \uparrow$ | $D_a \downarrow$ |
|-----------------|-------------------------|-------------------------|-------------------------|-------------------------|-------------------|----------------|------------------|
| Art             | 76.3 $\Rightarrow$ 74.5 | 47.1 $\Rightarrow$ 43.5 | 64.9 $\Rightarrow$ 63.3 | 72.2 $\Rightarrow$ 71.6 | 0.10              | 1.93           | 1.80             |
| Clipart         | 57.8 $\Rightarrow$ 55.7 | 80.1 $\Rightarrow$ 79.7 | 63.5 $\Rightarrow$ 61.5 | 68.8 $\Rightarrow$ 68.8 | 0.75              | 1.34           | 0.40             |
| Product         | 56.6 $\Rightarrow$ 51.0 | 45.2 $\Rightarrow$ 37.0 | 92.7 $\Rightarrow$ 90.1 | 72.7 $\Rightarrow$ 68.2 | 3.13              | 6.08           | 2.60             |
| RealWorld       | 63.8 $\Rightarrow$ 62.5 | 49.2 $\Rightarrow$ 43.8 | 75.5 $\Rightarrow$ 73.7 | 84.4 $\Rightarrow$ 84.4 | 2.39              | 2.83           | 0.00             |
| Mean            | /                       |                         |                         |                         | 1.59              | 3.05           | 1.20             |

Table 22. The accuracy (%) of target-free NTL [28] on the Office-Home-65 [27]. The vertical/horizontal axis denotes the authorized/test domain. In each task, the left of ' $\Rightarrow$ ' shows the test accuracy of supervised learning CNN on the test domain, while the right side presents the accuracy of NTL.  $W_{ua}$  represents the proposed weighted drop, while  $D_u$  and  $D_a$  denote the drop rates for the unauthorized and authorized domains, respectively.

| Authorized/Test | Art                     | Clipart                 | Product                 | RealWorld               | $W_{ua} \uparrow$ | $D_u \uparrow$ | $D_a \downarrow$ |
|-----------------|-------------------------|-------------------------|-------------------------|-------------------------|-------------------|----------------|------------------|
| Art             | 76.3 $\Rightarrow$ 69.5 | 47.1 $\Rightarrow$ 39.3 | 64.9 $\Rightarrow$ 56.8 | 72.2 $\Rightarrow$ 68.5 | -0.19             | 6.53           | 6.80             |
| Clipart         | 57.8 $\Rightarrow$ 44.5 | 80.1 $\Rightarrow$ 73.7 | 63.5 $\Rightarrow$ 59.1 | 68.8 $\Rightarrow$ 61.7 | 1.36              | 8.24           | 6.40             |
| Product         | 56.6 $\Rightarrow$ 42.2 | 45.2 $\Rightarrow$ 31.3 | 92.7 $\Rightarrow$ 84.6 | 72.7 $\Rightarrow$ 61.7 | 4.21              | 13.08          | 8.10             |
| RealWorld       | 63.8 $\Rightarrow$ 53.1 | 49.2 $\Rightarrow$ 40.4 | 75.5 $\Rightarrow$ 68.5 | 84.4 $\Rightarrow$ 80.2 | 3.72              | 8.83           | 4.20             |
| Mean            | /                       |                         |                         |                         | 2.28              | 9.17           | 6.38             |

Table 23. The accuracy (%) of target-free CUTI-Domain [29] on the Office-Home-65 [27]. The vertical/horizontal axis denotes the authorized/test domain. In each task, the left of ' $\Rightarrow$ ' shows the test accuracy of supervised learning CNN on the test domain, while the right side presents the accuracy of CUTI-Domain.  $W_{ua}$  represents the proposed weighted drop, while  $D_u$  and  $D_a$  denote the drop rates for the unauthorized and authorized domains, respectively.

| Authorized/Test | Art                     | Clipart                 | Product                 | RealWorld               | $W_{ua} \uparrow$ | $D_u \uparrow$ | $D_a \downarrow$ |
|-----------------|-------------------------|-------------------------|-------------------------|-------------------------|-------------------|----------------|------------------|
| Art             | 85.5 $\Rightarrow$ 81.8 | 68.0 $\Rightarrow$ 64.5 | 89.8 $\Rightarrow$ 88.3 | 88.5 $\Rightarrow$ 85.0 | -0.71             | 2.83           | 3.70             |
| Clipart         | 81.0 $\Rightarrow$ 78.8 | 75.0 $\Rightarrow$ 74.5 | 90.8 $\Rightarrow$ 91.8 | 89.5 $\Rightarrow$ 88.0 | 0.30              | 0.90           | 0.50             |
| Product         | 78.8 $\Rightarrow$ 60.0 | 73.3 $\Rightarrow$ 35.0 | 92.8 $\Rightarrow$ 89.5 | 87.5 $\Rightarrow$ 87.5 | 14.08             | 19.03          | 3.30             |
| RealWorld       | 83.0 $\Rightarrow$ 71.3 | 71.3 $\Rightarrow$ 31.8 | 90.8 $\Rightarrow$ 89.0 | 90.0 $\Rightarrow$ 87.3 | 13.07             | 17.67          | 2.70             |
| Mean            | /                       |                         |                         |                         | 6.68              | 10.11          | 2.55             |

Table 24. The accuracy (%) of target-free CLIP-based NTL [28] on the Office-Home-65 [27]. The vertical/horizontal axis denotes the authorized/test domain. In each task, the left of ' $\Rightarrow$ ' shows the test accuracy of supervised learning CLIP on the test domain, while the right side presents the accuracy of CLIP-based NTL.  $W_{ua}$  represents the proposed weighted drop, while  $D_u$  and  $D_a$  denote the drop rates for the unauthorized and authorized domains, respectively.

| Authorized/Test | Art                     | Clipart                 | Product                 | RealWorld               | $W_{ua} \uparrow$ | $D_u \uparrow$ | $D_a \downarrow$ |
|-----------------|-------------------------|-------------------------|-------------------------|-------------------------|-------------------|----------------|------------------|
| Art             | 85.5 $\Rightarrow$ 81.3 | 68.0 $\Rightarrow$ 62.5 | 89.8 $\Rightarrow$ 89.8 | 88.5 $\Rightarrow$ 83.8 | -0.65             | 3.40           | 4.20             |
| Clipart         | 81.0 $\Rightarrow$ 70.8 | 75.0 $\Rightarrow$ 73.8 | 90.8 $\Rightarrow$ 87.3 | 89.5 $\Rightarrow$ 78.5 | 5.19              | 8.23           | 1.20             |
| Product         | 78.8 $\Rightarrow$ 67.3 | 73.3 $\Rightarrow$ 49.8 | 92.8 $\Rightarrow$ 88.5 | 87.5 $\Rightarrow$ 67.0 | 12.57             | 18.50          | 4.30             |
| RealWorld       | 83.0 $\Rightarrow$ 79.5 | 71.3 $\Rightarrow$ 62.8 | 90.8 $\Rightarrow$ 86.3 | 90.0 $\Rightarrow$ 88.8 | 3.82              | 5.50           | 1.20             |
| Mean            | /                       |                         |                         |                         | 5.23              | 8.91           | 2.73             |

Table 25. The accuracy (%) of target-free CLIP-based CUTI-Domain [29] on the Office-Home-65 [27]. The vertical/horizontal axis denotes the authorized/test domain. In each task, the left of ' $\Rightarrow$ ' shows the test accuracy of supervised learning CLIP on the test domain, while the right side presents the accuracy of CLIP-based CUTI-Domain.  $W_{ua}$  represents the proposed weighted drop, while  $D_u$  and  $D_a$  denote the drop rates for the unauthorized and authorized domains, respectively.

| Authorized/Test | Art                     | Clipart                 | Product                 | RealWorld               | $W_{ua} \uparrow$ | $D_u \uparrow$ | $D_a \downarrow$ |
|-----------------|-------------------------|-------------------------|-------------------------|-------------------------|-------------------|----------------|------------------|
| Art             | 85.5 $\Rightarrow$ 79.5 | 68.0 $\Rightarrow$ 52.5 | 89.8 $\Rightarrow$ 87.8 | 88.5 $\Rightarrow$ 69.8 | 4.82              | 12.07          | 6.00             |
| Clipart         | 81.0 $\Rightarrow$ 56.0 | 75.0 $\Rightarrow$ 75.0 | 90.8 $\Rightarrow$ 87.3 | 89.5 $\Rightarrow$ 58.5 | 14.88             | 19.83          | 0.00             |
| Product         | 78.8 $\Rightarrow$ 46.8 | 73.3 $\Rightarrow$ 41.3 | 92.8 $\Rightarrow$ 89.0 | 87.5 $\Rightarrow$ 60.3 | 23.67             | 30.40          | 3.80             |
| RealWorld       | 83.0 $\Rightarrow$ 64.8 | 71.3 $\Rightarrow$ 35.0 | 90.8 $\Rightarrow$ 76.5 | 90.0 $\Rightarrow$ 89.8 | 20.41             | 22.93          | 0.20             |
| Mean            | /                       |                         |                         |                         | 15.95             | 21.31          | 2.50             |

Table 26. The accuracy (%) of target-free IP-CLIP on the Office-Home-65 [27]. The vertical/horizontal axis denotes the authorized/test domain. In each task, the left of ' $\Rightarrow$ ' shows the test accuracy of supervised learning CLIP on the test domain, while the right side presents the accuracy of IP-CLIP.  $W_{ua}$  represents the proposed weighted drop, while  $D_u$  and  $D_a$  denote the drop rates for the unauthorized and authorized domains, respectively.

| Authorized/Test | Art                     | Clipart                 | Product                 | Real                    | $W_{ua} \uparrow$ | $D_u \uparrow$ | $D_a \downarrow$ |
|-----------------|-------------------------|-------------------------|-------------------------|-------------------------|-------------------|----------------|------------------|
| Clipart         | 76.4 $\Rightarrow$ 59.1 | 49.5 $\Rightarrow$ 38.0 | 62.5 $\Rightarrow$ 51.6 | 47.0 $\Rightarrow$ 34.0 | -3.25             | 11.80          | 17.30            |
| Painting        | 48.0 $\Rightarrow$ 36.3 | 61.8 $\Rightarrow$ 53.3 | 60.4 $\Rightarrow$ 55.3 | 42.3 $\Rightarrow$ 36.5 | -0.52             | 7.53           | 8.50             |
| Real            | 52.3 $\Rightarrow$ 44.2 | 57.9 $\Rightarrow$ 54.1 | 85.6 $\Rightarrow$ 83.0 | 46.9 $\Rightarrow$ 41.6 | 2.60              | 5.73           | 2.60             |
| Sketch          | 52.5 $\Rightarrow$ 38.0 | 46.9 $\Rightarrow$ 35.5 | 62.8 $\Rightarrow$ 45.1 | 66.6 $\Rightarrow$ 56.4 | 2.44              | 14.53          | 10.20            |
| Mean            | /                       |                         |                         |                         | 0.32              | 9.90           | 9.47             |

Table 27. The accuracy (%) of target-free NTL [28] on the Mini-DomainNet [34]. The vertical/horizontal axis denotes the authorized/test domain. In each task, the left of ' $\Rightarrow$ ' shows the test accuracy of supervised learning CNN on the test domain, while the right side presents the accuracy of NTL.  $W_{ua}$  represents the proposed weighted drop, while  $D_u$  and  $D_a$  denote the drop rates for the unauthorized and authorized domains, respectively.

| Authorized/Test | Art                     | Clipart                 | Product                 | Real                    | $W_{ua} \uparrow$ | $D_u \uparrow$ | $D_a \downarrow$ |
|-----------------|-------------------------|-------------------------|-------------------------|-------------------------|-------------------|----------------|------------------|
| Clipart         | 76.4 $\Rightarrow$ 68.4 | 49.5 $\Rightarrow$ 43.9 | 62.5 $\Rightarrow$ 57.9 | 47.0 $\Rightarrow$ 41.3 | -1.85             | 5.30           | 8.00             |
| Painting        | 48.0 $\Rightarrow$ 39.3 | 61.8 $\Rightarrow$ 58.4 | 60.4 $\Rightarrow$ 61.8 | 42.3 $\Rightarrow$ 38.0 | 0.27              | 3.87           | 3.40             |
| Real            | 52.3 $\Rightarrow$ 44.1 | 57.9 $\Rightarrow$ 51.2 | 85.6 $\Rightarrow$ 82.1 | 46.9 $\Rightarrow$ 43.8 | 2.05              | 6.00           | 3.50             |
| Sketch          | 52.5 $\Rightarrow$ 44.2 | 46.9 $\Rightarrow$ 41.3 | 62.8 $\Rightarrow$ 56.6 | 66.7 $\Rightarrow$ 57.1 | -1.63             | 6.70           | 9.56             |
| Mean            | /                       |                         |                         |                         | -0.29             | 5.47           | 4.97             |

Table 28. The accuracy (%) of target-free CUTI-Domain [29] on the Mini-DomainNet [34]. The vertical/horizontal axis denotes the authorized/test domain. In each task, the left of ' $\Rightarrow$ ' shows the test accuracy of supervised learning CNN on the test domain, while the right side presents the accuracy of CUTI-Domain.  $W_{ua}$  represents the proposed weighted drop, while  $D_u$  and  $D_a$  denote the drop rates for the unauthorized and authorized domains, respectively.

| Authorized/Test | Art                     | Clipart                 | Product                 | Real                    | $W_{ua} \uparrow$ | $D_u \uparrow$ | $D_a \downarrow$ |
|-----------------|-------------------------|-------------------------|-------------------------|-------------------------|-------------------|----------------|------------------|
| Clipart         | 85.1 $\Rightarrow$ 80.5 | 79.8 $\Rightarrow$ 77.0 | 89.8 $\Rightarrow$ 88.4 | 78.7 $\Rightarrow$ 72.4 | -0.89             | 3.50           | 4.60             |
| Painting        | 83.8 $\Rightarrow$ 78.7 | 81.4 $\Rightarrow$ 77.5 | 89.1 $\Rightarrow$ 86.4 | 78.4 $\Rightarrow$ 73.0 | 0.39              | 4.40           | 3.90             |
| Real            | 84.6 $\Rightarrow$ 78.9 | 80.5 $\Rightarrow$ 69.7 | 90.6 $\Rightarrow$ 86.4 | 80.0 $\Rightarrow$ 68.4 | 4.46              | 9.37           | 4.20             |
| Sketch          | 84.3 $\Rightarrow$ 73.2 | 79.1 $\Rightarrow$ 74.9 | 90.3 $\Rightarrow$ 83.5 | 80.7 $\Rightarrow$ 77.3 | 3.07              | 7.37           | 3.40             |
| Mean            | /                       |                         |                         |                         | 1.76              | 6.16           | 4.23             |

Table 29. The accuracy (%) of target-free CLIP-based NTL [28] on the Mini-DomainNet [34]. The vertical/horizontal axis denotes the authorized/test domain. In each task, the left of ' $\Rightarrow$ ' shows the test accuracy of supervised learning CLIP on the test domain, while the right side presents the accuracy of CLIP-based NTL.  $W_{ua}$  represents the proposed weighted drop, while  $D_u$  and  $D_a$  denote the drop rates for the unauthorized and authorized domains, respectively.

| Authorized/Test | Art                     | Clipart                 | Product                 | Real                    | $W_{ua} \uparrow$ | $D_u \uparrow$ | $D_a \downarrow$ |
|-----------------|-------------------------|-------------------------|-------------------------|-------------------------|-------------------|----------------|------------------|
| Clipart         | 85.1 $\Rightarrow$ 80.8 | 79.8 $\Rightarrow$ 67.9 | 89.8 $\Rightarrow$ 85.4 | 78.7 $\Rightarrow$ 73.8 | 2.24              | 7.07           | 4.30             |
| Painting        | 83.8 $\Rightarrow$ 80.6 | 81.4 $\Rightarrow$ 78.1 | 89.1 $\Rightarrow$ 88.9 | 78.4 $\Rightarrow$ 71.1 | 0.21              | 3.57           | 3.30             |
| Real            | 84.6 $\Rightarrow$ 74.3 | 80.5 $\Rightarrow$ 74.6 | 90.6 $\Rightarrow$ 88.3 | 80.0 $\Rightarrow$ 69.4 | 5.86              | 8.93           | 2.30             |
| Sketch          | 84.3 $\Rightarrow$ 78.9 | 79.1 $\Rightarrow$ 74.1 | 90.3 $\Rightarrow$ 85.2 | 80.7 $\Rightarrow$ 77.2 | 1.29              | 5.17           | 3.50             |
| Mean            | /                       |                         |                         |                         | 2.40              | 6.18           | 3.30             |

Table 30. The accuracy (%) of target-free CLIP-based CUTI-Domain [29] on the Mini-DomainNet [34]. The vertical/horizontal axis denotes the authorized/test domain. In each task, the left of ' $\Rightarrow$ ' shows the test accuracy of supervised learning CLIP on the test domain, while the right side presents the accuracy of CLIP-based CUTI-Domain.  $W_{ua}$  represents the proposed weighted drop, while  $D_u$  and  $D_a$  denote the drop rates for the unauthorized and authorized domains, respectively.

| Authorized/Test | Art                     | Clipart                 | Product                 | Real                    | $W_{ua} \uparrow$ | $D_u \uparrow$ | $D_a \downarrow$ |
|-----------------|-------------------------|-------------------------|-------------------------|-------------------------|-------------------|----------------|------------------|
| Clipart         | 85.1 $\Rightarrow$ 81.1 | 79.8 $\Rightarrow$ 70.6 | 89.8 $\Rightarrow$ 86.4 | 78.7 $\Rightarrow$ 68.4 | 2.95              | 7.63           | 4.00             |
| Painting        | 83.8 $\Rightarrow$ 76.5 | 81.4 $\Rightarrow$ 78.7 | 89.1 $\Rightarrow$ 87.8 | 78.4 $\Rightarrow$ 75.2 | 0.97              | 3.93           | 2.70             |
| Real            | 84.6 $\Rightarrow$ 66.8 | 80.5 $\Rightarrow$ 66.8 | 90.6 $\Rightarrow$ 88.1 | 80.0 $\Rightarrow$ 57.1 | 13.77             | 18.13          | 2.50             |
| Sketch          | 84.3 $\Rightarrow$ 78.6 | 79.1 $\Rightarrow$ 69.8 | 90.3 $\Rightarrow$ 80.6 | 80.7 $\Rightarrow$ 77.3 | 3.74              | 8.23           | 3.40             |
| Mean            | /                       |                         |                         |                         | 5.36              | 9.48           | 3.07             |

Table 31. The accuracy (%) of target-free IP-CLIP on the Mini-DomainNet [34]. The vertical/horizontal axis denotes the authorized/test domain. In each task, the left of ' $\Rightarrow$ ' shows the test accuracy of supervised learning CLIP on the test domain, while the right side presents the accuracy of IP-CLIP.  $W_{ua}$  represents the proposed weighted drop, while  $D_u$  and  $D_a$  denote the drop rates for the unauthorized and authorized domains, respectively.

| Authorized/Test | Amazon | Dslr | Webcam | $D_{ua} \uparrow$ | $A_u \downarrow$ | $A_a \uparrow$ |
|-----------------|--------|------|--------|-------------------|------------------|----------------|
| Amazon          | 3.1    | 6.3  | 6.3    | 1.63              | 5.21             | 15.63          |
| Dslr            | 7.8    | 3.1  | 3.1    | 9.23              | 4.69             | 32.81          |
| Webcam          | 0.0    | 0.0  | 0.0    | 11.82             | 0.00             | 34.38          |
| Mean            | /      |      |        | 7.56              | 3.30             | 27.60          |

Table 32.  $D_{ua}$ ,  $A_u$ , and  $A_a$  of authorization application NTL [28] on the Office-31 [26]. The vertical/horizontal axis denotes the authorized/test domain.  $D_{ua}$  represents the proposed weighted drop, while  $A_u^{IP}$  and  $A_a^{IP}$  denote the accuracy of the unauthorized and test domains, respectively.

| Authorized/Test | Amazon | Dslr | Webcam | $D_{ua} \uparrow$ | $A_u \downarrow$ | $A_a \uparrow$ |
|-----------------|--------|------|--------|-------------------|------------------|----------------|
| Amazon          | 0.0    | 1.6  | 0.0    | 27.95             | 0.52             | 53.13          |
| Dslr            | 10.9   | 0.0  | 1.6    | 72.92             | 4.17             | 87.50          |
| Webcam          | 34.4   | 43.8 | 32.8   | 40.01             | 37.00            | 84.40          |
| Mean            | /      |      |        | 46.96             | 13.90            | 75.01          |

Table 33.  $D_{ua}$ ,  $A_u$ , and  $A_a$  of authorization application CUTI-Domain [29] on the Office-31 [26]. The vertical/horizontal axis denotes the authorized/test domain.  $D_{ua}$  represents the proposed weighted drop, while  $A_u^{IP}$  and  $A_a^{IP}$  denote the accuracy of the unauthorized and test domains, respectively.

| Authorized/Test | Amazon | Dslr | Webcam | $D_{ua} \uparrow$ | $A_u \downarrow$ | $A_a \uparrow$ |
|-----------------|--------|------|--------|-------------------|------------------|----------------|
| Amazon          | 57.5   | 13.8 | 41.0   | 15.67             | 37.43            | 62.50          |
| Dslr            | 78.7   | 18.5 | 54.3   | 39.25             | 50.50            | 92.80          |
| Webcam          | 31.8   | 17.3 | 14.8   | 54.59             | 21.30            | 85.30          |
| Mean            | /      |      |        | 36.50             | 36.41            | 80.20          |

Table 34.  $D_{ua}$ ,  $A_u$ , and  $A_a$  of authorization application CLIP-based NTL [28] on the Office-31 [26]. The vertical/horizontal axis denotes the authorized/test domain.  $D_{ua}$  represents the proposed weighted drop, while  $A_u^{IP}$  and  $A_a^{IP}$  denote the accuracy of the unauthorized and test domains, respectively.

| Authorized/Test | Amazon | Dslr | Webcam | $D_{ua} \uparrow$ | $A_u \downarrow$ | $A_a \uparrow$ |
|-----------------|--------|------|--------|-------------------|------------------|----------------|
| Amazon          | 36.0   | 7.5  | 19.0   | 29.26             | 20.83            | 65.50          |
| Dslr            | 74.0   | 6.3  | 29.3   | 54.47             | 36.53            | 94.30          |
| Webcam          | 57.0   | 12.5 | 22.3   | 40.56             | 30.60            | 80.80          |
| Mean            | /      |      |        | 41.43             | 29.32            | 80.20          |

Table 35.  $D_{ua}$ ,  $A_u$ , and  $A_a$  of authorization application CLIP-based CUTI-Domain [29] on the Office-31 [26]. The vertical/horizontal axis denotes the authorized/test domain.  $D_{ua}$  represents the proposed weighted drop, while  $A_u^{IP}$  and  $A_a^{IP}$  denote the accuracy of the unauthorized and test domains, respectively.

| Authorized/Test | Amazon | Dslr | Webcam | $D_{ua} \uparrow$ | $A_u \downarrow$ | $A_a \uparrow$ |
|-----------------|--------|------|--------|-------------------|------------------|----------------|
| Amazon          | 4.5    | 3.3  | 2.8    | 37.46             | 3.53             | 63.00          |
| Dslr            | 27.3   | 1.5  | 0.5    | 82.42             | 9.77             | 95.80          |
| Webcam          | 31.0   | 4.3  | 11.3   | 56.45             | 15.53            | 83.30          |
| Mean            | /      |      |        | 58.78             | 9.61             | 80.70          |

Table 36.  $D_{ua}$ ,  $A_u$ , and  $A_a$  of authorization application IP-CLIP on the Office-31 [26]. The vertical/horizontal axis denotes the authorized/test domain.  $D_{ua}$  represents the proposed weighted drop, while  $A_u^{IP}$  and  $A_a^{IP}$  denote the accuracy of the unauthorized and test domains, respectively.

| Authorized/Test | Art  | Clipart | Product | RealWorld | $D_{ua} \uparrow$ | $A_u \downarrow$ | $A_a \uparrow$ |
|-----------------|------|---------|---------|-----------|-------------------|------------------|----------------|
| Art             | 77.3 | 42.7    | 64.6    | 71.1      | 8.75              | 63.93            | 75.52          |
| Clipart         | 44.8 | 58.9    | 46.4    | 51.6      | 4.98              | 50.39            | 58.85          |
| Product         | 50.0 | 43.0    | 78.4    | 62.2      | 17.49             | 58.40            | 80.21          |
| RealWorld       | 60.9 | 46.6    | 69.3    | 83.1      | 15.83             | 64.97            | 83.85          |
| Mean            | /    |         |         |           | 11.76             | 59.42            | 74.61          |

Table 37.  $D_{ua}$ ,  $A_u$ , and  $A_a$  of authorization application NTL [28] on the Office-Home-65 [27]. The vertical/horizontal axis denotes the authorized/test domain.  $D_{ua}$  represents the proposed weighted drop, while  $A_u^{IP}$  and  $A_a^{IP}$  denote the accuracy of the unauthorized and test domains, respectively.

| Authorized/Test | Art  | Clipart | Product | RealWorld | $D_{ua} \uparrow$ | $A_u \downarrow$ | $A_a \uparrow$ |
|-----------------|------|---------|---------|-----------|-------------------|------------------|----------------|
| Art             | 1.6  | 1.0     | 0.8     | 0.8       | 35.25             | 1.04             | 59.90          |
| Clipart         | 0.8  | 0.8     | 0.8     | 0.5       | 14.78             | 0.72             | 38.80          |
| Product         | 2.1  | 0.8     | 0.0     | 0.3       | 33.27             | 0.78             | 58.07          |
| RealWorld       | 21.9 | 19.5    | 39.6    | 44.3      | 3.15              | 31.32            | 39.32          |
| Mean            | /    |         |         |           | 21.61             | 8.46             | 49.02          |

Table 38.  $D_{ua}$ ,  $A_u$ , and  $A_a$  of authorization application CUTI-Domain [29] on the Office-Home-65 [27]. The vertical/horizontal axis denotes the authorized/test domain.  $D_{ua}$  represents the proposed weighted drop, while  $A_u^{IP}$  and  $A_a^{IP}$  denote the accuracy of the unauthorized and test domains, respectively.

| Authorized/Test | Art  | Clipart | Product | RealWorld | $D_{ua} \uparrow$ | $A_u \downarrow$ | $A_a \uparrow$ |
|-----------------|------|---------|---------|-----------|-------------------|------------------|----------------|
| Art             | 21.0 | 14.3    | 17.0    | 29.5      | 49.47             | 20.45            | 81.30          |
| Clipart         | 21.0 | 13.0    | 45.0    | 31.8      | 9.74              | 27.70            | 48.00          |
| Product         | 21.3 | 27.8    | 36.8    | 24.0      | 44.44             | 27.48            | 81.80          |
| RealWorld       | 10.3 | 22.5    | 27.5    | 16.5      | 51.50             | 19.20            | 82.00          |
| Mean            | /    |         |         |           | 38.79             | 23.71            | 73.28          |

Table 39.  $D_{ua}$ ,  $A_u$ , and  $A_a$  of authorization application CLIP-based NTL [28] on the Office-Home-65 [27]. The vertical/horizontal axis denotes the authorized/test domain.  $D_{ua}$  represents the proposed weighted drop, while  $A_u^{IP}$  and  $A_a^{IP}$  denote the accuracy of the unauthorized and test domains, respectively.

| Authorized/Test | Art  | Clipart | Product | RealWorld | $D_{ua} \uparrow$ | $A_u \downarrow$ | $A_a \uparrow$ |
|-----------------|------|---------|---------|-----------|-------------------|------------------|----------------|
| Art             | 4.5  | 5.0     | 21.0    | 11.0      | 54.95             | 10.38            | 79.50          |
| Clipart         | 11.0 | 16.0    | 36.5    | 20.0      | 16.86             | 20.88            | 52.80          |
| Product         | 18.0 | 33.5    | 61.0    | 29.0      | 39.53             | 35.38            | 83.00          |
| RealWorld       | 7.5  | 3.5     | 10.8    | 9.5       | 62.87             | 7.83             | 83.30          |
| Mean            | /    |         |         |           | 43.55             | 18.61            | 74.65          |

Table 40.  $D_{ua}$ ,  $A_u$ , and  $A_a$  of authorization application CLIP-based CUTI-Domain [29] on the Office-Home-65 [27]. The vertical/horizontal axis denotes the authorized/test domain.  $D_{ua}$  represents the proposed weighted drop, while  $A_u^{IP}$  and  $A_a^{IP}$  denote the accuracy of the unauthorized and test domains, respectively.

| Authorized/Test | Art | Clipart | Product | RealWorld | $D_{ua} \uparrow$ | $A_u \downarrow$ | $A_a \uparrow$ |
|-----------------|-----|---------|---------|-----------|-------------------|------------------|----------------|
| Art             | 1.5 | 3.3     | 7.8     | 3.0       | 60.12             | 3.88             | 79.50          |
| Clipart         | 4.3 | 5.3     | 22.5    | 9.8       | 26.52             | 10.48            | 57.00          |
| Product         | 5.8 | 9.3     | 12.0    | 6.5       | 57.74             | 8.40             | 80.30          |
| RealWorld       | 2.3 | 4.0     | 8.5     | 6.0       | 71.17             | 5.20             | 87.00          |
| Mean            | /   |         |         |           | 53.89             | 6.99             | 75.95          |

Table 41.  $D_{ua}$ ,  $A_u$ , and  $A_a$  of authorization application IP-CLIP on the Office-Home-65 [27]. The vertical/horizontal axis denotes the authorized/test domain.  $D_{ua}$  represents the proposed weighted drop, while  $A_u^{IP}$  and  $A_a^{IP}$  denote the accuracy of the unauthorized and test domains, respectively.

| Authorized/Test | Clipart | Painting | Real | Sketch | $D_{ua} \uparrow$ | $A_u \downarrow$ | $A_a \uparrow$ |
|-----------------|---------|----------|------|--------|-------------------|------------------|----------------|
| Clipart         | 75.0    | 48.2     | 62.2 | 46.9   | 11.96             | 58.06            | 74.18          |
| Painting        | 51.6    | 69.1     | 68.4 | 43.9   | 7.47              | 58.26            | 69.08          |
| Real            | 47.5    | 53.1     | 83.2 | 44.2   | 21.08             | 57.03            | 82.57          |
| Sketch          | 53.9    | 48.4     | 62.7 | 68.9   | 7.72              | 58.47            | 69.57          |
| Mean            | /       |          |      |        | 12.06             | 57.96            | 73.85          |

Table 42.  $D_{ua}$ ,  $A_u$ , and  $A_a$  of authorization application NTL [28] on the Mini-DomainNet [34]. The vertical/horizontal axis denotes the authorized/test domain.  $D_{ua}$  represents the proposed weighted drop, while  $A_u^{IP}$  and  $A_a^{IP}$  denote the accuracy of the unauthorized and test domains, respectively.

| Authorized/Test | Clipart | Painting | Real | Sketch | $D_{ua} \uparrow$ | $A_u \downarrow$ | $A_a \uparrow$ |
|-----------------|---------|----------|------|--------|-------------------|------------------|----------------|
| Clipart         | 78.5    | 50.5     | 64.1 | 49.0   | 13.75             | 60.53            | 78.13          |
| Painting        | 38.5    | 56.3     | 54.6 | 31.3   | 6.47              | 45.15            | 56.58          |
| Real            | 48.5    | 54.9     | 85.4 | 44.9   | 22.62             | 58.43            | 85.03          |
| Sketch          | 50.8    | 48.8     | 61.0 | 68.3   | 7.00              | 57.24            | 67.60          |
| Mean            | /       |          |      |        | 12.46             | 55.34            | 71.83          |

Table 43.  $D_{ua}$ ,  $A_u$ , and  $A_a$  of authorization application CUTI-Domain [29] on the Mini-DomainNet [34]. The vertical/horizontal axis denotes the authorized/test domain.  $D_{ua}$  represents the proposed weighted drop, while  $A_u^{IP}$  and  $A_u^{IP}$  denote the accuracy of the unauthorized and test domains, respectively.

| Authorized/Test | Clipart | Painting | Real | Sketch | $D_{ua} \uparrow$ | $A_u \downarrow$ | $A_a \uparrow$ |
|-----------------|---------|----------|------|--------|-------------------|------------------|----------------|
| Clipart         | 13.5    | 8.7      | 12.1 | 35.9   | 38.45             | 17.54            | 71.40          |
| Painting        | 26.2    | 15.1     | 14.3 | 41.1   | 32.78             | 24.18            | 70.60          |
| Real            | 41.1    | 21.8     | 24.6 | 64.1   | 35.66             | 37.90            | 81.60          |
| Sketch          | 16.5    | 7.8      | 11.3 | 30.6   | 38.66             | 16.55            | 71.00          |
| Mean            | /       |          |      |        | 36.39             | 24.04            | 73.65          |

Table 44.  $D_{ua}$ ,  $A_u$ , and  $A_a$  of authorization application CLIP-based NTL [28] on the Mini-DomainNet [34]. The vertical/horizontal axis denotes the authorized/test domain.  $D_{ua}$  represents the proposed weighted drop, while  $A_u^{IP}$  and  $A_u^{IP}$  denote the accuracy of the unauthorized and test domains, respectively.

| Authorized/Test | Clipart | Painting | Real | Sketch | $D_{ua} \uparrow$ | $A_u \downarrow$ | $A_a \uparrow$ |
|-----------------|---------|----------|------|--------|-------------------|------------------|----------------|
| Clipart         | 57.9    | 24.3     | 31.1 | 63.0   | 22.77             | 44.08            | 74.60          |
| Painting        | 46.5    | 13.8     | 21.6 | 57.0   | 24.48             | 34.73            | 69.80          |
| Real            | 42.4    | 17.9     | 21.9 | 57.1   | 33.56             | 34.83            | 77.90          |
| Sketch          | 6.0     | 4.8      | 6.4  | 20.6   | 48.18             | 9.45             | 74.30          |
| Mean            | /       |          |      |        | 32.25             | 30.77            | 74.15          |

Table 45.  $D_{ua}$ ,  $A_u$ , and  $A_a$  of authorization application CLIP-based CUTI-Domain [29] on the Mini-DomainNet [34]. The vertical/horizontal axis denotes the authorized/test domain.  $D_{ua}$  represents the proposed weighted drop, while  $A_u^{IP}$  and  $A_u^{IP}$  denote the accuracy of the unauthorized and test domains, respectively.



| Authorized/Test | Clipart | Painting | Real | Sketch | $D_{ua} \uparrow$ | $A_u \downarrow$ | $A_a \uparrow$ |
|-----------------|---------|----------|------|--------|-------------------|------------------|----------------|
| Clipart         | 4.6     | 5.1      | 4.8  | 14.9   | 50.88             | 7.35             | 75.10          |
| Painting        | 7.5     | 4.6      | 8.4  | 23.2   | 40.33             | 10.93            | 69.20          |
| Real            | 17.3    | 8.4      | 9.8  | 38.1   | 54.06             | 18.40            | 83.30          |
| Sketch          | 4.6     | 3.8      | 5.7  | 18.7   | 48.27             | 8.20             | 73.70          |
| Mean            | /       |          |      |        | 48.39             | 11.22            | 75.33          |

Table 46.  $D_{ua}$ ,  $A_u$ , and  $A_a$  of authorization application IP-CLIP on the Mini-DomainNet [34]. The vertical/horizontal axis denotes the authorized/test domain.  $D_{ua}$  represents the proposed weighted drop, while  $A_u^{IP}$  and  $A_a^{IP}$  denote the accuracy of the unauthorized and test domains, respectively.

| Modules                                 | $\mathcal{L}_a$ | $\mathcal{L}_u$ | $\mathcal{L}_{dis}$ | $\mathcal{L}_{aug}$ | $W_{ua} \uparrow$ | $D_u \uparrow$ | $D_a \downarrow$ |
|-----------------------------------------|-----------------|-----------------|---------------------|---------------------|-------------------|----------------|------------------|
| Baseline (SL-CLIP)                      | ✓               |                 |                     |                     | /                 | /              | /                |
| Baseline+IP                             | ✓               | ✓               |                     |                     | 23.96             | 30.81          | 2.35             |
| Baseline+IP+Proj                        | ✓               | ✓               | ✓                   |                     | 53.60             | 65.41          | 0.41             |
| <b>Proposed</b> (Baseline+IP+Proj+STAM) | ✓               | ✓               | ✓                   | ✓                   | <b>54.68</b>      | <b>65.48</b>   | <b>0.33</b>      |

Table 47. Ablation experiments on Mini-DomainNet.  $\mathcal{L}_a$  is used for supervised learning on the authorized domain as the baseline. "Baseline+IP" naively trains both domains simultaneously, using entropy ( $\mathcal{L}_{en}$ ) to enhance text feature diversity. The addition of the IP projector (Baseline+IP+Proj) incorporates  $\mathcal{L}_{dis}$  ( $\mathcal{L}_{kl} + \mathcal{L}_m$ ) to distinguishing text and domain features across domains. STAM with  $\mathcal{L}_{aug}$  ( $\mathcal{L}_{ai} + \mathcal{L}_{ui}$ ) further enhances domain token robustness in domain feature identification (Proposed).
